1 **Profiling DNA Methylation Differences Between Inbred Mouse Strains**  
2 **on the Illumina Human Infinium MethylationEPIC Microarray**

3 **Short title:** Cross-species utility of human DNA methylation microarray

4 Hemant Gujar<sup>1</sup>, Jane W. Liang<sup>1</sup>, Nicholas C. Wong<sup>2</sup>, Khyobeni Mozhui<sup>1,3\*</sup>

5  
6 <sup>1</sup> Department of Preventive Medicine, University of Tennessee Health Science Center,  
7 Memphis, Tennessee 38163, USA

8 <sup>2</sup> Monash Bioinformatics Platform, Monash University, Clayton VIC, Australia

9 <sup>3</sup> Department of Genetics, Genomics and Informatics, University of Tennessee Health  
10 Science Centre, Memphis, Tennessee 38163, USA

11 \* **Corresponding author**

12 Khyobeni Mozhui

13 Department of Preventive Medicine, College of Medicine

14 University of Tennessee Health Science Center

15 66 N. Pauline Street, #631

16 Memphis, TN 38163

17 Phone no. 901-448-7334

18 Email: [kmozhui@uthsc.edu](mailto:kmozhui@uthsc.edu)

## 19 **Abstract**

20 The Illumina Infinium MethylationEPIC provides an efficient platform for profiling DNA  
21 methylation in humans at over 850,000 CpGs. Model organisms such as mice do not  
22 currently benefit from an equivalent array. Here we used this array to measure DNA  
23 methylation in mice. We defined probes targeting conserved regions and performed a  
24 comparison between the array-based assay and affinity-based DNA sequencing of  
25 methyl-CpGs (MBD-seq). Mouse samples consisted of 11 liver DNA from two strains,  
26 C57BL/6J (B6) and DBA/2J (D2), that varied widely in age. Linear regression was  
27 applied to detect differential methylation. In total, 13,665 probes (1.6% of total probes)  
28 aligned to conserved CpGs. Beta-values ( $\beta$ -value) for these probes showed a  
29 distribution similar to that in humans. Overall, there was high concordance in  
30 methylation signal between the EPIC array and MBD-seq (Pearson correlation  $r = 0.70$ ,  
31  $p$ -value  $< 0.0001$ ). However, the EPIC probes had higher quantitative sensitivity at  
32 CpGs that are hypo- ( $\beta$ -value  $< 0.3$ ) or hypermethylated ( $\beta$ -value  $> 0.7$ ). In terms of  
33 differential methylation, no EPIC probe detected significant difference between age  
34 groups at a Benjamini-Hochberg threshold of 10%, and the MBD-seq performed better  
35 at detecting age-dependent change in methylation. However, the top most significant  
36 probe for age (cg13269407; uncorrected  $p$ -value =  $1.8 \times 10^{-5}$ ) is part of the clock CpGs  
37 used to estimate the human epigenetic age. For strain, 219 Infinium probes detected  
38 significant differential methylation (FDR cutoff 10%) with ~80% CpGs associated with  
39 higher methylation in D2. This higher methylation profile in D2 compared to B6 was also  
40 replicated by the MBD-seq data. To summarize, we found only a small subset of EPIC  
41 probes that target conserved sites. However, for this small subset the array provides a

42 reliable assay of DNA methylation and can be effectively used to measure differential  
43 methylation in mice.

44 **Keywords:** DNA methylation, epigenetics, microarray, cross-species comparison

45

## 46 **Introduction**

47 There has been a surge in large-scale epigenetic studies in recent years. In particular,  
48 epigenome-wide association studies (EWAS) of DNA methylation have shown  
49 association with physiological traits [1,2], diseases [3-5], environmental exposures [6,7],  
50 aging [8], and even socioeconomic [9] and emotional experiences [10]. The  
51 development of robust and reliable methylation microarrays has been an important  
52 driving force. In particular, the Illumina Human Methylation BeadChips have made it  
53 both convenient and cost-effective to incorporate an epigenetic arm to large  
54 epidemiological studies [11,12]. The latest version, the Illumina Infinium  
55 MethylationEPIC BeadChip (EPIC), provides an efficient high throughput platform to  
56 quantify methylation at 866,836 CpG sites on the human genome [13,14]. A remarkable  
57 biological insight that has emerged from these array-based studies is the definition of  
58 the methylation-based “epigenetic clock,” a biomarker of human age and aging (i.e., the  
59 epigenetic clock) that is defined using specific probes represented on these arrays [8].

60 Currently there is no equivalent microarray platform for model organisms and work in  
61 experimental species have largely relied on high-throughput sequencing. For instance,  
62 while the human DNA methylation age can be calculated from a few hundred probes on  
63 the Illumina BeadChips, a similar effort in mice required a more extensive sequencing of  
64 the mouse methylome [15]. However, CpG islands (CGIs) are largely conserved  
65 between mice and humans and the two species share similar numbers of CGIs and  
66 similar proportions of CGIs in promoter regions of genes [16]. Considering that these  
67 CpGs and CGIs are highly conserved in gene regulatory regions, it is feasible that

68 probes on the human microarrays that target these sites may have some application in  
69 research using rodent models. This was previously evaluated for the two older versions  
70 of the Illumina HumanMethylation BeadChips [17]. The work by Wong et al.  
71 demonstrated that a subset of the probes targeting highly conserved sites provide  
72 reliable measures of DNA methylation in mice, and could be feasibly used to evaluate  
73 tissue specific methylation and in cancer related studies using the mouse as a model  
74 system.

75 In the present work, we extend the conservation analysis to the EPIC platform, and  
76 evaluate the capacity of these probes to detect differential methylation. We begin by  
77 defining the conserved probes and the key features of the corresponding CpG sites in  
78 the context of the larger mouse and human genome. We also compare the methylation  
79 signal detected by the conserved probes with affinity-based methyl-CpG enriched DNA  
80 sequence (MBD-seq) data from the same samples and evaluate if the conserved  
81 probes are informative of age and strain differences in mice.

## 82 **Materials and Methods**

### 83 **Defining Conserved EPIC probes**

84 Sequences for the 866,836 CpG probes were obtained from Illumina  
85 (<http://www.illumina.com/>). The probe sequences were aligned to the mouse genome  
86 (mm10) using bowtie2 (version 2.2.6) with standard default parameters. A total of  
87 34,981 probes aligned to the mouse genome of varying alignment quality. Conserved  
88 probes were then defined based on quality of alignment. For this, we filtered out all

89 sequences with a low mapping quality (MAPQ) of less than 60 (15,717 excluded) and  
90 those that contain more than two non-matching base pairs (1,092). To retain only the  
91 high quality probes, we further filtered probes based on confidence in DNA methylation  
92 signal and based on this, 4,507 probes with detection p-values > 0.0001 were removed.  
93 This generated a list of 13,665 high quality probes that are conserved sequences and  
94 provide reliable methylation assays in mice (these are listed in **Supplementary Data**  
95 **S1**). CpG island annotations [18] for the respective genome were downloaded from  
96 UCSC Genome Browser (<http://genome.ucsc.edu>) and distribution of conserved probes  
97 and positions of CGIs were plotted to the human (GRCh37) and mouse (mm10)  
98 genomes using CIRCOS [19].

99 For conserved sequences, there is high correspondence in functional and genomic  
100 features between mouse and human genomes and we referred to the human probe  
101 annotations provided by Illumina to define the location of conserved probes with respect  
102 to gene features and CpG context (i.e., islands, shores, shelves) (**Supplementary**  
103 **Data S1**). To evaluate if the conserved set is enriched in specific features relative to the  
104 full background set, we performed a hypergeometric test using the phyper function in R.

## 105 **Animals and sample preparation**

106 Tissues samples were derived from mice that were part of an aging cohort maintained  
107 at the University of Tennessee Health Science Center (PI: Robert W. Williams). Details  
108 on animal rearing and sample collection are described in Mozhui and Pandey 2017 [20].  
109 All animal procedures were approved by the UTHSC Animal Care and Use Committee.

110 Liver tissues were collected from mice aged at ~4 months (mos; young), ~12 mos (mid),  
111 and ~24 mos (old). The mice were of two different strains—C57BL/6J (B6) and DBA/2J  
112 (D2)—and as the colony was set up to study aging in females, the majority of the mice  
113 in this study are females (**Table 1**). Mice were euthanized by intraperitoneal injection of  
114 Avertin (250 to 500 mg/kg of a 20 mg/ml solution), followed by cardiac puncture and  
115 exsanguination. All sample collection procedures were done on the same day within a  
116 3-hour timeframe. Liver samples were snap-frozen and stored at -80°C until use.

117 DNA was purified from the liver tissue using the Qiagen AllPrep kit  
118 (<http://www.qiagen.com>) on the QIAcube system. Nucleic acid quality was checked  
119 using a NanoDrop spectrophotometer (<http://www.nanodrop.com>). As reference, we  
120 also included two human samples. These are DNA derived from the buffy coats from  
121 two individuals.

122 **Table 1: Sample details and average methylation signal intensity**

| Sample  | Age   | Age (months) | Strain <sup>1</sup> | Sex | Full set (850K) |        | Conserved set (13665) |        |
|---------|-------|--------------|---------------------|-----|-----------------|--------|-----------------------|--------|
|         |       |              |                     |     | Mean            | Median | Mean                  | Median |
| Mouse1  | young | 4            | D2                  | F   | 505             | 394    | 3206                  | 1898   |
| Mouse2  | young | 4            | D2                  | F   | 926             | 524    | 10989                 | 10278  |
| Mouse7  | young | 4            | B6                  | F   | 877             | 538    | 9866                  | 8702   |
| Mouse8  | young | 4            | B6                  | F   | 766             | 397    | 10386                 | 9975   |
| Mouse3  | mid   | 12           | D2                  | F   | 852             | 483    | 10615                 | 9880   |
| Mouse4  | mid   | 12           | D2                  | F   | 818             | 430    | 10866                 | 10542  |
| Mouse5  | mid   | 12           | D2                  | M   | 845             | 456    | 11545                 | 10982  |
| Mouse9  | mid   | 12           | B6                  | M   | 852             | 444    | 11433                 | 11187  |
| Mouse6  | old   | 24           | D2                  | F   | 737             | 379    | 10206                 | 9611   |
| Mouse10 | old   | 24           | B6                  | F   | 845             | 448    | 10767                 | 10436  |
| Mouse11 | old   | 24           | B6                  | F   | 886             | 490    | 11302                 | 10741  |
| Human1  |       |              |                     |     | 7568            | 7218   | 8710                  | 8616   |
| Human2  |       |              |                     |     | 10668           | 10288  | 11761                 | 11599  |

123 <sup>1</sup> D2: DBA/2J; B6: C57BL/6J

124

## 125 **DNA methylation microarray and data processing**

126 DNA methylation assays were performed as per the standard manufacturer's protocol  
127 (<http://www.illumina.com/>). In brief, 500 ng of DNA extracted from the mouse liver was  
128 treated with sodium bisulfite to convert cytosine to uracil. The 5-methyl cytosine remains  
129 unreactive to sodium bisulfite. The DNA is then hybridized to the EPIC BeadChip. After  
130 washing off unhybridized DNA, a single base extension was recorded to calculate the  
131 methylation level at the CpG probe site. DNA methylation assays were performed at the  
132 Genomic Services Lab at the HudsonAlpha Institute for Biotechnology  
133 (<http://hudsonalpha.org>). Raw intensity data files (idat files) for both mouse and human  
134 samples were processed using the R package, Minfi [21].

135 The intensity and  $\beta$ -values were used to evaluate the performance of the EPIC probes  
136 in mice and humans. Comparisons were based on the full set of 850K probes and the  
137 conserved set of 13,665 probes. We also used the  $\beta$ -values and signal intensity scores  
138 for the 13,665 probes to perform hierarchical clustering and principal component  
139 analysis for the mouse samples. From initial quality checks, we identified one outlier  
140 mouse sample (**Supplementary Fig. S1**) that had lower intensity and higher detection  
141 p-value compared to the other mouse samples. This sample was excluded from the  
142 statistical tests.

## 143 **MBD-seq comparison**



144 The mouse samples we report here were previously assayed for DNA methylation using  
145 MBD-seq [20]. This is an affinity-based enrichment of methylated CpGs using the  
146 methyl binding domain (MBD) of methyl-CpG-binding protein 2, followed by high  
147 throughput sequencing (MBD-seq) [22-24]. Sequencing was performed on Life  
148 Technologies' Ion Proton platform. Data have been deposited to the NCBI's Gene  
149 Expression Omnibus (<https://www.ncbi.nlm.nih.gov/geo/>; GEO accession ID  
150 GSE95361) and Sequence Repository Archive (<https://www.ncbi.nlm.nih.gov/sra/>; SRA  
151 accession ID SRP100703). To compare methylation signal detected by the conserved  
152 EPIC arrays, we extracted MBD-seq reads at the corresponding sites. MBD-seq does  
153 not provide single-base resolution as the resolution is limited to the fragment size, in this  
154 case ~300 bp. However, since methylation levels at neighboring CpGs are largely  
155 correlated [25], we derived quantitative data from the number of read fragments that  
156 map to a CpG region. For the sites in the mouse genome targeted by the conserved  
157 EPIC probes, we expanded the window to 300 bp bins, and extracted the MBD-seq  
158 fragment counts. The CpG density-normalized methylation level was then quantified  
159 using the MEDIPS R package [26]. We then used Pearson's correlation to compare the  
160 EPIC  $\beta$ -values and the relative methylation score (rms or the CpG density normalized  
161 methylation) detected by MBD-seq [27].

## 162 **Analysis of differential methylation**

163 Statistical analyses were done in R (<https://www.r-project.org/>) and JMP Statistics (JMP  
164 Pro 12). Mice were grouped into three age categories (young, mid, and old; additional  
165 sample details are in **Table 1**). To evaluate differential methylation detected by the

166 13,655 conserved probes, we applied a regression model with age, strain and sex as  
167 predictors (~ageGroups + strain + sex) for each probe using the R glm function and type  
168 III anova to calculate test statistics (equations are provided in **Supplementary Data**  
169 **S1**). For the MBD-seq reads, we performed differential methylation analysis of the read  
170 counts using the edgeR R package [28]. The same linear regression model was applied  
171 (~ageGroups + strain + sex) and equations are provided in **Supplementary Data S1**.  
172 We then cross-compared differential methylation detected by the two methods. Treating  
173 the EPIC data as a discovery set, we applied the Benjamini-Hochberg (BH) procedure  
174 to control the false discovery rate (FDR) [29,30]. We then defined differentially  
175 methylated CpGs (DMCpGs) and evaluated the corresponding region in the MBD-seq  
176 data to test replication at a lenient uncorrected p-value threshold of 0.05. Likewise, in  
177 the reverse comparison, we applied an FDR threshold to identify differentially  
178 methylated regions (DMRs) in the MBD-seq data, and tested replication of the  
179 corresponding CpG at an uncorrected p-value threshold of 0.05.

## 180 **Results**

### 181 **Conserved Infinium MethylationEPIC probes**

182 The human EPIC array contains 866,836 50-mer probes. Out of these, we defined a  
183 total of 13,665 probes that align to conserved sites in the mouse genome and provide  
184 high quality methylation signal (details on mapping quality scores and methylation signal  
185 confidence are provided in **Supplementary data S1**). In the full set of EPIC probes,  
186 71% are located within annotated gene features or within 200–1,500 bp upstream of  
187 transcription start sites (TSS). Compared to this background set, a higher percent of the

188 conserved probes (88%; 11,972 probes) target such functionally annotated regions.  
 189 Probes that target CpGs located in exons, 5' UTR, and within 200 bp upstream of TSS  
 190 (TSS200) are highly overrepresented among the conserved set (**Table 2**). This is  
 191 expected, since sequences in these functional regions are conserved across species.  
 192 The upstream regulatory regions and the first exon harbor a large percent of CGIs, and  
 193 compared to the background set, there is close to a 2.5-fold higher enrichment in CGIs  
 194 among the conserved probes (**Table 2**). In contrast, there is no enrichment in probes  
 195 that target CpGs that are between 200–1,500 bp upstream of TSS (TSS1500), gene  
 196 body (mostly intronic), 3' UTRs, and non-genic regions. Locations of the conserved  
 197 probes and CGI densities in the human and mouse genomes are shown in **Fig. 1**.

198 **Table 2: Genomic features of CpGs and enrichment in conserved sites**

| Feature                                             | Full set<br>(850K) |                  | Conserved set<br>(13665) |                  | Enrichment p <sup>3</sup> |
|-----------------------------------------------------|--------------------|------------------|--------------------------|------------------|---------------------------|
|                                                     | Counts             | Percent<br>Total | Counts                   | Percent<br>Total |                           |
| <b>Gene features<sup>1</sup></b>                    |                    |                  |                          |                  |                           |
| TSS1500                                             | 107193             | 12               | 1195                     | 9                | ns                        |
| TSS200                                              | 65152              | 8                | 1940                     | 14               | <1.0E-15                  |
| 5'UTR                                               | 73070              | 8                | 1269                     | 9                | 1.8E-04                   |
| 1stExon                                             | 26433              | 3                | 2028                     | 15               | <1.0E-15                  |
| Exon                                                | 5680               | 1                | 282                      | 2                | <1.0E-15                  |
| 3'UTR                                               | 21594              | 2                | 340                      | 2                | ns                        |
| Body                                                | 318165             | 37               | 4918                     | 36               | ns                        |
| Non-Genic                                           | 249549             | 29               | 1693                     | 12               | ns                        |
| <b>CpG islands and flanking regions<sup>2</sup></b> |                    |                  |                          |                  |                           |
| Islands                                             | 161598             | 19               | 6270                     | 46               | <1.0E-15                  |
| Shores                                              | 154735             | 18               | 2267                     | 17               | ns                        |
| Shelves                                             | 61811              | 7                | 664                      | 5                | ns                        |
| Open Sea                                            | 488692             | 56               | 4464                     | 33               | ns                        |

199 <sup>1</sup> CpG position relative to gene features based on annotations from Illumina (UCSC\_RefGene\_Group).  
 200 TSS1500 and TSS200 are CpGs at 0–200 or 200–1500 upstream of transcription start sites; Non-  
 201 genic are CpG with no annotated gene features.

202 <sup>2</sup> Shores = 0–2 kb from islands; shelves = 2–4 kb from islands

203 <sup>3</sup> Enrichment of gene features and CpG regions in the conserved set compared to the full set based on  
204 hypergeometric test

205

206

207 **Fig. 1. Location of conserved Illumina HumanMethylationEPIC probes and CpG**  
208 **densities in the human and mouse genomes.**

209 The outer circle displays the chromosomes and circular karyotype of the human and  
210 mouse genomes. CpG island (CGI) density is shown in the second circle. The  
211 innermost circle displays the positions of CpGs targeted by the 13,665 conserved  
212 probes.

213

214 **Comparison of probe performance in mouse and human samples**

215 We used data generated from two human samples as reference. Using the full set of  
216 850K probes, the mouse samples showed low overall signal intensity (**Fig. 2A**). The  
217 mean signal intensity for the two human samples was  $9,118 \pm 2,192$  (**Table 1**). For the  
218 mouse samples, the mean signal intensity was  $810 \pm 114$  (**Table 1**). The  $\beta$ -value  
219 distribution also showed poor performance for mice with a peak  $\beta$ -value at 0.4 that  
220 indicates failure for probes. The methylation  $\beta$ -values in human samples showed the  
221 expected bimodal distribution that characterizes the Illumina methylation arrays (**Fig.**  
222 **2B**) [13,14].

223 The EPIC BeadChip clearly performed poorly in mice when we considered the full set of  
224 probes. However, when we considered only the 13,665 conserved probes, the  
225 methylation signal became comparable between the mouse and human samples. Total

226 mean signal intensity for the mouse samples ranged from 9,866 to 11,545 (Mouse1,  
227 which failed the initial QC, has very low signal intensity compared to the other mouse  
228 samples; this was excluded from differential methylation analysis) (**Table 1**). Mean  
229 signal intensity for the two human samples were 8,711 and 11,761 (**Table 1**). The  
230 bimodal  $\beta$  distribution was also observed for this set of conserved probes in mouse  
231 samples (**Fig. 2C, 2D**).

232

233 **Fig. 2. Distribution of signal intensities and methylation  $\beta$ -values in mice and**  
234 **humans.**

235 For the full set of 866,836 probes on the Illumina Infinium MethylationEPIC, the mouse  
236 samples have **(A)** low signal intensity compared to the two human samples, and **(B)** the  
237  $\beta$ -values have a unimodal distribution that peaks at  $\sim 0.4$ . The two human samples have  
238 the expected bimodal distribution for  $\beta$ -values. For the conserved set of 13665 probes,  
239 both the **(C)** signal intensity, and **(D)** the  $\beta$ -value distribution in the mouse samples are  
240 comparable to the two human reference samples. The signal intensity for mouse1 is  
241 relatively low for the conserved set of probes and this sample plots as an outlier in the  
242 principal component analysis.

243

244 **Comparison with MBD-seq**

245 To determine if we could find concordant methylation signal, we compared the  
246 microarray  $\beta$ -values with the CpG density-normalized rms derived from MBD-seq data  
247 (average  $\beta$ -values and rms are provided in **Supplementary data S1**). Overall, there

248 was concordance between the two technologies, and the  $\beta$ -values and rms were  
249 significantly correlated (Pearson's correlation of 0.70,  $p < 0.0001$ ). We grouped the  
250 EPIC probes into three categories based on  $\beta$ -values—hypomethylated for  $\beta < 0.3$ ,  
251 hemimethylated for  $0.3 \leq \beta \leq 0.7$ , and hypermethylated for  $\beta > 0.7$ —and examined  
252 correlations with the rms within each category. Given the high representation of islands  
253 and CpGs in 5' regions of genes, which generally remain hypomethylated [16,31], the  
254 majority of the conserved probes fell into the hypomethylated category (**Table 3**). For  
255 the hypomethylated probes, 82% of the corresponding CpG regions also had rms  $< 0.3$   
256 (**Table 3**) and there was modest correlation between the rms and  $\beta$ -values (Pearson's  $r$   
257 = 0.18;  $p = 0.0001$ ; **Fig. 3A**). For many of the CpGs regions that correspond to the  
258 hypomethylated probes, the rms were close to 0 and appeared unmethylated in the  
259 MBD-seq data. For hemimethylated probes, 58% of the corresponding regions had  $0.3$   
260  $\leq$  rms  $\leq 0.7$  and 31% had rms  $< 0.3$ . This subset showed the highest correlation  
261 between the  $\beta$ -values and rms ( $r = 0.46$ ;  $p < 0.0001$ ; **Fig. 3B**). For hypermethylated  
262 probes, only 40% of corresponding regions were associated with rms  $> 0.7$ , and 54%  
263 had  $0.3 \leq$  rms  $\leq .7$ . This subset showed lower correlation between the  $\beta$ -values and rms  
264 ( $r = 0.04$ ,  $p = 0.0392$ ; **Fig. 3C**). The corresponding CpG regions for this  
265 hypermethylated set tended to have rms close to 0.75. This clustered rms distribution  
266 for CpG regions at the lower and upper levels of methylation indicate that the MBD-seq  
267 has lower quantitative sensitivity at these regions.

268 Overall, the strong concordance with the MBD-seq data shows that the conserved EPIC  
269 probes provide a reliable quantification of methylation in mice. However, for CpGs that

270 are hypomethylated or hypermethylated, the EPIC technology may have an advantage  
271 and provide higher quantitative sensitivity compared to the MBD-seq.

272 **Table 3. Counts of Illumina HumanMethylationEPIC probes by  $\beta$ -value and**  
273 **concordance with MBD-seq at corresponding CpG regions**

| CpG Category <sup>1</sup>         | Probes counts <sup>1</sup> | Counts of CpG regions by rms value <sup>2</sup> |                 |           |
|-----------------------------------|----------------------------|-------------------------------------------------|-----------------|-----------|
|                                   |                            | rms < 0.3                                       | 0.3 ≤ rms ≤ 0.7 | rms > 0.7 |
| Hypo<br>$\beta < 0.3$             | 7548                       | 6198                                            | 1000            | 350       |
| Hemi<br>$0.3 \leq \beta \leq 0.7$ | 3159                       | 973                                             | 1827            | 359       |
| Hyper<br>$\beta > 0.7$            | 2956                       | 171                                             | 1599            | 1186      |

274 <sup>1</sup>Conserved probes on the HumanMethylationEPIC arrays were grouped by  $\beta$ -value. These are counts in  
275 each category.

276 <sup>2</sup>CpG For each category of probes, the corresponding CpG regions were counted and grouped by CpG  
277 density normalized relative methylation score (rms) to determine concordance between the array and  
278 MBD-seq

279

280

### 281 **Fig. 3. Correlation between MethylationEPIC and MBD-seq data**

282 The 13,665 conserved MethylationEPIC probes were classified into three categories  
283 based on average  $\beta$ -values: hypo for  $\beta < 0.3$ , hemi for  $0.3 \leq \beta \leq 0.7$ , and hyper for  $\beta >$   
284  $0.7$ . For each probe, the 300 bp window around the corresponding CpG was determined  
285 and the CpG density-normalized relative methylation score (rms) was estimated for that  
286 region from MBD-seq data. A comparison between the  $\beta$ -values and rms showed **(A)**  
287 modest correlation for the hypomethylated CpGs (Pearson  $r = 0.18$ ;  $p = 0.0001$ ), **(B)**  
288 strong correlation for hemimethylated CpGs ( $r = 0.46$ ;  $p < 0.0001$ ), and **(C)** low  
289 correlation for hypermethylated CpG ( $r = 0.04$ ,  $p = 0.0392$ ). For CpGs with low  $\beta$ -values,  
290 the corresponding regions showed rms that cluster close to 0, and for CpG with high  $\beta$ -  
291 values, the corresponding rms tended to cluster close to 0.75.

## 292 **Differential Methylation Analysis**

293 We applied linear regression to examine differential methylation by age group and  
294 strain, and cross-referenced the DM-CpGs detected by the EPIC array with DMRs  
295 detected by MBD-seq. For the effect of age, no conserved EPIC probe passed a 10%  
296 FDR threshold (full results and p-values are provided in **Supplementary data S1**).  
297 However, we note that the probe that detected the most significant effect of age,  
298 cg13269407, is among the 353 CpGs that are used to estimate the human epigenetic  
299 age [8]. This CpG is hemimethylated (average  $\beta$ -value of 0.55) and associated with a  
300 ~2.4-fold decline in methylation between young and old age (uncorrected p-value =  $1.8$   
301  $\times 10^{-5}$ ). In the MBD-seq, the corresponding region is classified as hypomethylated with  
302 rms = 0 for most of the samples and no reliable statistics could be carried out for this  
303 region due to small number of mapped reads. We then performed a reverse comparison  
304 to identify age-dependent DMRs (age-DMRs) in the MBD-seq data and evaluated  
305 replication by the EPIC probes. At the same FDR threshold of 10%, the MBD-seq  
306 detected seven age-DMRs. These strong age-DMRs have rms between 0.3 and 0.7 and  
307 are associated with an increase in methylation with age. Most occur in CGIs that have  
308 been reported previously [20]. Out of these seven age-DMRs, six corresponding EPIC  
309 probes replicated the age-dependent increase in methylation at a nominal p-value cutoff  
310 of 0.05 (**Table 4**).

311

312



313 **Table 4. Age-dependent differentially methylated CpGs/regions detected by**  
 314 **conserved probes and by MBD-seq**

| ProbeID    | Gene <sup>2</sup>            | Region <sup>2</sup> | Position (mm10) <sup>3</sup> | EPIC <sup>1</sup> |         | MBD-seq <sup>1</sup> |         |
|------------|------------------------------|---------------------|------------------------------|-------------------|---------|----------------------|---------|
|            |                              |                     |                              | Coef.             | Age (P) | logFC                | Age (P) |
| cg08949408 | <i>C1QL3</i>                 | Body; Island        | chr2:13.01                   | 0.32              | 0.001   | 3.3                  | 1.3E-10 |
| cg10444382 | <i>RFX4</i>                  | Body; Island        | chr10:84.76                  | 0.24              | 9.4E-04 | 2.9                  | 2.5E-08 |
| cg22384902 | <i>LRRC4;</i><br><i>SND1</i> | TSS1500; island     | chr6:28.83                   | 0.22              | 0.009   | 2.0                  | 2.0E-06 |
| cg06945399 | <i>LRRC4;</i><br><i>SND1</i> | TSS200; Island      | chr6:28.83                   | 0.18              | 0.057   | 1.5                  | 2.2E-05 |
| cg23398076 | <i>MEIS1</i>                 | Body; Shelf         | chr11:19.02                  | 0.13              | 0.007   | 1.5                  | 2.4E-05 |
| cg05393688 | <i>TSC22D1</i>               | Body; Shore         | chr14:76.51                  | 0.17              | 0.005   | 1.5                  | 2.8E-05 |
| cg20563498 | <i>USP35</i>                 | Body; Shelf         | chr7:97.32                   | -0.02             | 0.27    | 1.1                  | 3.2E-05 |

315 <sup>1</sup>These are age-dependent differentially methylated CpG regions discovered in the MBD-seq at an FDR of  
 316 10%; replicated for the corresponding CpG in the EPIC microarray at an uncorrected p-value cutoff of  
 317 0.05. Coef. is the linear regression coefficient (i.e., change in methylation  $\beta$ -value from young to old).  
 318 LogFC is log<sub>2</sub> fold change in methylation from young to old.

319 <sup>2</sup>CpG location in relation to gene features and CpG region based in probe annotations for the human  
 320 methylation microarray; gene feature annotations are the same for the corresponding regions in the  
 321 mouse genome.

322 <sup>3</sup>Chromosome and Megabase coordinate based on mm10 mouse reference genome

323

324 For strain effect, 219 conserved EPIC probes detected significant difference in  
 325 methylation between B6 and D2 at an FDR threshold of 10% (strain-DMCpGs). Close to  
 326 80% of these CpGs (175 out of 219) are associated with higher methylation in D2  
 327 relative to B6. In the MBD-seq data, only 29 of the 219 corresponding regions replicated  
 328 strain effect at an uncorrected p-value cutoff 0.05 (**Table 5**). Of these, 9 were  
 329 associated with higher methylation in B6, and 20 were associated with higher  
 330 methylation in D2. In the reverse comparison, we identified only 37 strain-dependent  
 331 DMRs (strain-DMRs) at an FDR cutoff of 10%. Consistent with the EPIC data, the  
 332 majority of these regions (21 of the 37) showed higher methylation in D2 relative to B6.

333 Of these, 16 strain differences were replicated at the corresponding CpG in the EPIC  
 334 data (6 with higher methylation in B6 and 10 with higher methylation in D2) (**Table 5**).

335 **Table 5. Strain-dependent differentially methylated CpGs/regions detected by**  
 336 **both EPIC probes and by MBD-seq**

| ProbelD                                                                                    | Gene <sup>3</sup> | Region <sup>4</sup> | Position<br>(mm10) <sup>3</sup> | EPIC <sup>1</sup>  |               | MBD-seq <sup>1</sup> |               |
|--------------------------------------------------------------------------------------------|-------------------|---------------------|---------------------------------|--------------------|---------------|----------------------|---------------|
|                                                                                            |                   |                     |                                 | Coef. <sup>2</sup> | Strain<br>(P) | logFC <sup>2</sup>   | Strain<br>(P) |
| Differentially methylated CpGs detected by EPIC probe at FDR 10%;<br>replicated by MBD-seq |                   |                     |                                 |                    |               |                      |               |
| cg21064315                                                                                 | <i>SZT2</i>       | 3'UTR;<br>Shore     | chr4:118.36                     | -0.82              | 5.5E-09       | -2.0                 | 1.7E-04       |
| cg14945867                                                                                 | <i>CNIH</i>       | 1stExon;<br>Island  | chr14:46.79                     | 0.27               | 1.3E-06       | 6.0                  | 1.2E-09       |
| cg04546815                                                                                 | <i>KANK4</i>      | Body                | chr4:98.78                      | 0.34               | 1.6E-06       | 1.7                  | 4.4E-04       |
| cg10277781                                                                                 | <i>CNIH</i>       | 1stExon;<br>Island  | chr14:46.79                     | 0.35               | 1.9E-06       | 6.0                  | 1.2E-09       |
| cg00049718                                                                                 | <i>CSDE1</i>      | 5'UTR               | chr3:103.02                     | 0.40               | 2.6E-06       | 6.8                  | 9.8E-15       |
| cg07211292                                                                                 | <i>C20orf160</i>  | 3'UTR;<br>Island    | chr2:153.08                     | -0.46              | 5.0E-06       | -1.5                 | 1.4E-05       |
| cg24255125                                                                                 | <i>GRIK4</i>      | Body;<br>Island     | chr9:42.52                      | -0.36              | 7.8E-06       | -3.0                 | 5.9E-09       |
| cg03517030                                                                                 | <i>MTCH2</i>      | 1stExon;<br>Island  | chr2:90.85                      | 0.35               | 1.6E-05       | 6.7                  | 2.3E-14       |
| cg05781968                                                                                 | <i>WNT5A</i>      | Body;<br>Island     | chr14:28.51                     | 0.31               | 4.4E-05       | 2.3                  | 1.0E-05       |
| cg04154281                                                                                 | <i>UBTF</i>       | Body;<br>Shore      | chr11:102.31                    | 0.17               | 6.5E-05       | 0.7                  | 0.03          |
| cg06861375                                                                                 | <i>ZNF697</i>     | Body;<br>Island     | chr3:98.43                      | 0.36               | 6.7E-05       | 4.5                  | 2.8E-04       |
| cg24959134                                                                                 | -                 | -                   | chr10:92.44                     | -0.33              | 9.4E-05       | -2.4                 | 0.01          |
| cg06552810                                                                                 | -                 | -                   | chr2:106.19                     | 0.26               | 1.1E-04       | 2.9                  | 0.002         |
| cg01663821                                                                                 | -                 | Shore               | chr3:98.94                      | 0.19               | 1.3E-04       | 0.9                  | 0.02          |
| cg00597112                                                                                 | -                 | -                   | chr11:109.01                    | 0.21               | 1.4E-04       | 0.5                  | 0.002         |
| cg26857408                                                                                 | <i>UBTF</i>       | Body;<br>Shore      | chr11:102.31                    | 0.24               | 2.1E-04       | 0.7                  | 0.03          |
| cg15172734                                                                                 | <i>SLMAP</i>      | 5'UTR;<br>Shore     | chr14:26.53                     | -0.11              | 3.4E-04       | -2.5                 | 0.01          |
| cg09990537                                                                                 | <i>WNT5A</i>      | 5'UTR;<br>Shore     | chr14:28.51                     | 0.17               | 3.4E-04       | 1.0                  | 0.004         |
| cg12849734                                                                                 | -                 | -                   | chr2:157.71                     | 0.14               | 4.4E-04       | 0.9                  | 0.01          |
| cg21746387                                                                                 | <i>NDUFA4L2</i>   | TSS1500;<br>Shore   | chr10:127.51                    | -0.17              | 5.5E-04       | -3.4                 | 0.001         |
| cg11382417                                                                                 | -                 | -                   | chr2:96.32                      | -0.21              | 6.0E-04       | -4.7                 | 1.3E-07       |
| cg02865068                                                                                 | -                 | Shore               | chr2:105.66                     | 0.11               | 9.7E-04       | 2.9                  | 0.04          |
| cg14275842                                                                                 | <i>CHRNE</i>      | Body;<br>Island     | chr11:70.62                     | 0.18               | 0.001         | 1.0                  | 0.005         |
| cg02159996                                                                                 | <i>GABRR1</i>     | 5'UTR               | chr4:33.13                      | 0.13               | 0.001         | 1.2                  | 2.5E-04       |
| cg00920372                                                                                 | -                 | -                   | chr19:45.33                     | -0.08              | 0.001         | -1.5                 | 8.8E-04       |

|            |                |                |              |       |       |      |       |
|------------|----------------|----------------|--------------|-------|-------|------|-------|
| cg03422015 | <i>ERC1</i>    | Body           | chr6:119.69  | 0.04  | 0.001 | 1.1  | 0.02  |
| cg04340318 | -              | -              | chr4:86.04   | 0.16  | 0.001 | 2.3  | 0.001 |
| cg14465355 | <i>DYNC1H1</i> | Body;<br>Shore | chr12:110.64 | 0.06  | 0.001 | 0.6  | 0.02  |
| cg15002641 | <i>SOX13</i>   | Body           | chr1:133.39  | -0.10 | 0.001 | -1.0 | 0.02  |

Differentially methylated regions detected by MBD-seq at FDR 10%;  
replicated by EPIC

|            |                 |                   |             |       |       |      |         |
|------------|-----------------|-------------------|-------------|-------|-------|------|---------|
| cg05362127 | <i>WNT5A</i>    | TSS200;<br>Island | chr14:28.51 | 0.33  | 0.002 | 2.3  | 9.4E-06 |
| cg24142850 | -               | -                 | chr8:92.55  | -0.09 | 0.005 | -2.9 | 9.4E-05 |
| cg15585318 | <i>WNT5A</i>    | Body;<br>Island   | chr14:28.51 | 0.22  | 0.006 | 1.8  | 2.1E-06 |
| cg09595163 | <i>WNT5A</i>    | Body;<br>Island   | chr14:28.51 | 0.18  | 0.006 | 2.3  | 1.2E-05 |
| cg13868216 | <i>BAIAP2L2</i> | Body;<br>Island   | chr15:79.26 | 0.11  | 0.01  | 1.6  | 1.8E-04 |
| cg09972454 | <i>PDXDC1</i>   | Body;<br>Shore    | chr4:147.94 | -0.06 | 0.01  | -2.9 | 1.5E-06 |
| cg18120446 | -               | Island            | chr5:41.75  | 0.01  | 0.02  | -2.2 | 2.7E-08 |

337 <sup>1</sup>These are strain-dependent differentially methylated CpGs (EPIC microarray) and CpG regions (MBD-  
338 seq) based on a “false discovery threshold” (FDR) cutoff of 10% and replication at an uncorrected p-value  
339 threshold of 0.05.

340 <sup>2</sup>Coef. is the linear regression coefficient (i.e., difference in methylation relative to C57BL/6J; negative is  
341 lower methylation in DBA/2J; and positive is higher methylation in DBA/2J compared to C57BL/6J).  
342 LogFC is log<sub>2</sub> fold difference in methylation (i.e., difference in methylation relative to DBA/2J; negative is  
343 lower methylation in DBA/2J; and positive is higher methylation in DBA/2J compared to C57BL/6J).

344 <sup>3</sup>CpG location in relation to gene features and CpG region based in probe annotations for the human  
345 methylation microarray. For most conserved regions, mouse annotations are analogous to humans.

346 <sup>4</sup>Chromosome and Megabase coordinate based on mm10 mouse reference genome

347

## 348 Discussion

349 Given the high sequence conservation between the mouse and human genomes, we  
350 used the recently released Illumina MethylationEPIC microarray to assay DNA  
351 methylation at conserved CpGs in the mouse genome. We evaluated both the  
352 qualitative features as well as the quantitative performance and compared it with MBD-  
353 seq data that was generated on the same DNA samples from mice. Such a cross-  
354 species approach has been previously used to examine gene expression and perform  
355 comparative genomics studies [32-35]. The Illumina methylation array relies on bisulfite  
356 conversion and the probes are designed to target bisulfite-converted sequences. The

357 two older versions of this Illumina methylation microarrays, the Infinium  
358 HumanMethylation 27K (HM27) and HumanMethylation 450K (HM450), have been  
359 carefully evaluated for use in mice [17]. The number of probes that map to the mouse  
360 genome can vary somewhat depending on the alignment algorithm. In the work by  
361 Wong et al. [17], alignment to the bisulfite-converted mouse genome resulted in the  
362 highest number of conserved probes. Using a stringent parameter of 100% sequence  
363 identity to the bisulfite genome, Wong et al. identified a total of 1,308 (4.7% of total)  
364 uniquely aligned probes in the 27K array, and 13,715 (2.8% of total) uniquely aligned  
365 probes in the 450K array that can be used to interrogate conserved CpGs in the mouse.  
366 In our present work, we performed alignment in a non-bisulfite space. While we required  
367 unique alignment, we tolerated up to two non-matching base pairs and added detection  
368 confidence as another parameter to identify probes that we can use for reliably  
369 quantitative assays. With these parameters, we identified 1.6% of total probes (13,665  
370 in the 850K MethylationEPIC array) that aligned uniquely to the mouse genome and  
371 associated with high confidence in signal detection. In this set of 13,665 conserved  
372 EPIC probes, 9,429 (69%) were CpG loci carried over from the HM450 array and 7,483  
373 of these were also in Wong's list of conserved HM450 probes [17]. While alignment to  
374 the bisulfite-converted genome may have yielded a higher proportion of aligned probes,  
375 for our purposes the 13,665 probes provided a representative subset that we can use to  
376 assess quantitative performance in mouse samples and utility in detecting methylation  
377 variation.

378 The conserved probes mostly target CpGs located within annotated genes and in  
379 regulatory regions. In particular, exons, 5' UTRs, CGIs in proximal regulatory regions

380 (within 200 bp of TSS) are highly overrepresented among the set of 13,665 probes. This  
381 is expected since these coding and regulatory regions are the most conserved portions  
382 of the genome. Humans and mice have similar complements of CGIs and the genomic  
383 positions of these CGIs are also highly conserved, with 50% of CGIs located near  
384 annotated TSSs in both species [16,31,36]. In terms of quantitative variation in  
385 methylation, CGIs and promoter region CpGs show significant population variation [37].  
386 However, compared to intergenic CpGs, the extent of inter-individual variability in  
387 methylation is reported to be much lower in these conserved sites [38,39]. Hence, an  
388 obvious limitation in using the conserved EPIC probes is that we attain only a narrow  
389 perspective of the mouse methylome and we may be sampling the portion of CpGs that  
390 shows the least quantitative variability in a population. Nonetheless, CpGs in regulatory  
391 regions and CGIs play crucial roles in development and cell differentiation, and are  
392 implicated in tumor development and aging [16,31,36,40,41]. While narrow in  
393 perspective, the conserved probes likely represent a subset of CpGs with high  
394 functional relevance and application in cross-species study of DNA methylation.

395 To evaluate the quantitative performance of the EPIC probes, we compared methylation  
396 levels measured by a complementary technology, MBD-seq. The type of methylation  
397 information measured by the microarray and MBD-seq are somewhat different. The  
398 EPIC probes, based on bisulfite conversion, measure the methylation status at a single  
399 CpG dinucleotide. MBD-seq, on the other hand, relies on affinity capture of DNA  
400 fragments by the methyl-CpG binding domain protein [22-24]. The affinity is directly  
401 proportional to the number of methylated CpGs in the DNA fragment and the  
402 methylation level is indirectly estimated based on the counts of sequenced reads that

403 map to that region. This means that the resolution is inherently limited by the sizes of  
404 the fragments (in this case ~300 bp). Since methylation of neighboring CpGs is  
405 generally correlated [42-44], MBD-seq provides information on the methylation level of  
406 CpGs in a region rather than one CpG site. For the 13,665 conserved EPIC probes, we  
407 extracted read counts from within 300 bp bins of the targeted CpGs and derived the  
408 CpG density-normalized read counts. Overall, there is strong concordance in  
409 methylation levels measured by the two technologies and the correlation between the  $\beta$ -  
410 values and rms was strongest for CpGs that are moderately methylated (we define  
411 these as  $\beta$ -values between 0.3 to 0.7 methylated). However, for CpGs that are  
412 hypomethylated and hypermethylated, the rms for the corresponding regions showed a  
413 more clustered distribution and indicated a limited quantitative sensitivity for MBD-seq  
414 and limited capacity in discerning quantitative variation at such CpG regions. Our  
415 observations agree with a previous study that compared HM450 and MBD-seq data  
416 generated using the same commercial kit we used [45].

417 For a direct comparison between the EPIC probes and MBD-seq, we applied the same  
418 regression model and crosschecked the DMCPGs and DMRs detected by the two  
419 technologies. While we expected a higher quantitative sensitivity for the EPIC probes as  
420 to age, the EPIC probes did not detect significant differential methylation at an FDR  
421 threshold of 10%. However, the topmost significant probe, cg13269407, is part of the  
422 353 clock CpGs that are used to estimate human DNA methylation age [8]. Consistent  
423 with the negative correlation with age in humans, this age-informative CpG was  
424 associated with a ~2.4-fold reduction in methylation in the old mice relative to the young  
425 mice. Aside from cg13269407, only 10 other human clock CpG probes were in the

426 conserved set and none of these are associated with age in mice. Overall, the effect of  
427 age was weak when we considered individual CpGs. When we examined the  
428 corresponding CpG regions, the MBD-seq was more effective at detecting age-  
429 dependent methylation. At an FDR cutoff of 10%, we identified seven CpG regions that  
430 are classified as age-DMRs. These age-DMRs have been previously reported and show  
431 increases in methylation with age in mice [20]. For these age-DMRs identified by MBD-  
432 seq, we then checked whether the EPIC probes could verify the age effect. For this  
433 cross-verification, we used a less stringent statistical threshold of 0.05 for uncorrected  
434 p-values and found that six of the targeted CpGs are also associated with a significant  
435 age-dependent increases in  $\beta$ -values. Our observations suggest that age-dependent  
436 changes in methylation at these conserved sites may be more pronounced if we  
437 consider the correlated change of neighboring CpGs rather than methylation status of a  
438 single CpG. Despite the low overall quantitative sensitivity, the MBD-seq provides a  
439 complementary approach that may perform better for detecting methylation changes in  
440 regions harboring multiple correlated CpGs.

441 DNA methylation can vary substantially between mouse strains and a large fraction of  
442 this is likely due to underlying sequence differences between strains [20,46,47]. Strain  
443 variation in methylation has been shown to associate with complex phenotypes in mice  
444 such as insulin resistance, adiposity, and blood cell counts [48]. In our analysis, we  
445 detected 219 CpGs (i.e., 1.6% of the 13,365 interrogated CpGs) with a significant  
446 difference between strains at an FDR cutoff of 10%. A large majority (175 out of 219  
447 CpGs) was associated with higher methylation in D2 compared to B6. While the overall  
448 lower methylation in B6 is intriguing, such variation between strains must be cautiously

449 interpreted. It is well known that SNPs in probe sequences can have a strong  
450 confounding effect. This is particularly pernicious for mouse specific microarrays in  
451 which probe sequences are usually based on the B6 mouse reference, and as a result,  
452 there is more efficient hybridization for B6-derived samples, which results in a positive  
453 bias for this canonical mouse strain [49-51]. In the present work, since the EPIC array is  
454 based on the human sequence, we do not expect a systematic bias for one strain over  
455 the other. For replication, we referred to the MBD-seq data and only 29 out of the 219  
456 corresponding CpG regions had consistent differential methylation between B6 and D2  
457 in the MBD-seq.

458 Unlike using a human array that should not bias one mouse strain over another, the  
459 MBD-seq data is more vulnerable to technical artifacts caused by sequence differences.  
460 As is the general practice, we performed the alignment of the MBD-seq reads to the  
461 mouse reference genome. This means the alignment will be more efficient for  
462 sequences from B6, while sequences from D2 will have more mismatches. Since  
463 methylation quantification is estimated from the relative number of aligned reads, this  
464 may result in a systematic negative bias for D2, and methylation levels in regions with  
465 sequence differences will tend to have lower methylation due to poorer alignment. As a  
466 result, a higher fraction of strain-DMR will have lower methylation in D2 compared to B6  
467 [20]. In the case that these conserved CpGs have higher methylation in D2 compared to  
468 B6, then the negative bias will lessen the quantitative difference between the strains.  
469 This may explain why the effect of strain is less pronounced in the MBD-seq data. In the  
470 MBD-seq, there were only 37 DMRs between B6 and D2 at an FDR threshold of 10%,  
471 and the EPIC probes replicated 16 of these. Out of the 37 strain-DMRs, the majority (21



472 of the 37) was associated with higher methylation in D2. Both the EPIC and MBD-seq  
473 therefore show an overall lower methylation profile in B6 compared to D2 that warrants  
474 further investigation and verification. Such strain differences in overall methylation has  
475 been previously reported for A/J and WSB/EiJ, with the A/J strain exhibiting higher  
476 methylation of CGIs in normal liver tissue compared to WSB/EiJ. This difference in the  
477 methylome was suggested to contribute to differential susceptibility for nonalcoholic  
478 fatty liver disease that characterizes the two strains [46]. In the case of B6 and D2, the  
479 two strains are highly divergent in a number of complex phenotypes ranging from  
480 behavioral and physiological to aging traits. The panel of recombinant inbred progeny  
481 derived from B6 and D2 (the BXD panel) has been used extensively in genetic research  
482 [52-56]. If there is indeed a distinct profile in DNA methylation between B6 and D2, then  
483 it will be of interest to evaluate if it segregates in the BXDs and how the methylome  
484 contributes to some of the phenotypic differences. The BXD panel could be an  
485 extremely rich and as yet untapped resource for methylome-wide analysis of complex  
486 traits that can then be integrated with the extensive systems genetics work that has  
487 already been done with this mouse family [57,58]. No doubt, large-scale analysis of  
488 genome-wide DNA methylation in mouse genetic reference panels will be greatly  
489 accelerated with the development of a mouse version of the Infinium methylation arrays.  
490 And as is the case with other types of arrays, it will be crucial that the probes are  
491 designed against a more diverse panel of strains so that investigators can derive a more  
492 unbiased readout of methylation [59].

493 To conclude, we have catalogued a small subset of EPIC probes that target conserved  
494 CpGs in the mouse genome and that provide reliable quantification of DNA methylation

495 in mouse samples. While detection for age-dependent methylation was weaker for the  
496 EPIC probes compared to MBD-seq, we have identified significant strain variation in  
497 methylation at the conserved CpGs. Our results indicate lower methylation for B6  
498 compared to D2 at sites that have significant strain effect. It is unclear how much of the  
499 strain variation results from underlying sequence differences between B6 and D2, and  
500 this strain-specific profile needs to be further evaluated and verified

501 **Acknowledgments:**

502 This work was supported by funds from UTHSC Faculty AwardUTC0M-2013KM. We  
503 are very grateful to Robert W. Williams for providing advice and access to the aging  
504 colony that is funded by NIA NIH grant R01AG043930.

## References:

1. Laffita-Mesa JM, Bauer PO, Kouri V, Pena Serrano L, Roskams J, et al. (2012) Epigenetics DNA methylation in the core ataxin-2 gene promoter: novel physiological and pathological implications. *Hum Genet* 131: 625-638.
2. Simeone P, Alberti S (2014) Epigenetic heredity of human height. *Physiol Rep* 2.
3. Egger G, Liang G, Aparicio A, Jones PA (2004) Epigenetics in human disease and prospects for epigenetic therapy. *Nature* 429: 457-463.
4. Portela A, Esteller M (2010) Epigenetic modifications and human disease. *Nat Biotechnol* 28: 1057-1068.
5. Toperoff G, Aran D, Kark JD, Rosenberg M, Dubnikov T, et al. (2012) Genome-wide survey reveals predisposing diabetes type 2-related DNA methylation variations in human peripheral blood. *Hum Mol Genet* 21: 371-383.
6. Breton CV, Byun HM, Wenten M, Pan F, Yang A, et al. (2009) Prenatal tobacco smoke exposure affects global and gene-specific DNA methylation. *Am J Respir Crit Care Med* 180: 462-467.
7. Baccarelli A, Wright RO, Bollati V, Tarantini L, Litonjua AA, et al. (2009) Rapid DNA methylation changes after exposure to traffic particles. *Am J Respir Crit Care Med* 179: 572-578.
8. Horvath S (2013) DNA methylation age of human tissues and cell types. *Genome Biol* 14: R115.
9. Swartz JR, Hariri AR, Williamson DE (2017) An epigenetic mechanism links socioeconomic status to changes in depression-related brain function in high-risk adolescents. *Mol Psychiatry* 22: 209-214.
10. Roth TL, Lubin FD, Funk AJ, Sweatt JD (2009) Lasting epigenetic influence of early-life adversity on the BDNF gene. *Biol Psychiatry* 65: 760-769.
11. Bibikova M, Barnes B, Tsan C, Ho V, Klotzle B, et al. (2011) High density DNA methylation array with single CpG site resolution. *Genomics* 98: 288-295.
12. Bibikova M, Le J, Barnes B, Saedinia-Melnyk S, Zhou LX, et al. (2009) Genome-wide DNA methylation profiling using Infinium (R) assay. *Epigenomics* 1: 177-200.
13. Moran S, Arribas C, Esteller M (2016) Validation of a DNA methylation microarray for 850,000 CpG sites of the human genome enriched in enhancer sequences. *Epigenomics* 8: 389-399.
14. Pidsley R, Zotenko E, Peters TJ, Lawrence MG, Risbridger GP, et al. (2016) Critical evaluation of the Illumina MethylationEPIC BeadChip microarray for whole-genome DNA methylation profiling. *Genome Biol* 17: 208.
15. Stubbs TM, Bonder MJ, Stark AK, Krueger F, Team BIAC, et al. (2017) Multi-tissue DNA methylation age predictor in mouse. *Genome Biol* 18: 68.
16. Deaton AM, Bird A (2011) CpG islands and the regulation of transcription. *Genes Dev* 25: 1010-1022.
17. Wong NC, Ng J, Hall NE, Lunke S, Salmanidis M, et al. (2013) Exploring the utility of human DNA methylation arrays for profiling mouse genomic DNA. *Genomics* 102: 38-46.
18. Gardiner-Garden M, Frommer M (1987) CpG islands in vertebrate genomes. *J Mol Biol* 196: 261-282.

19. Krzywinski M, Schein J, Birol I, Connors J, Gascoyne R, et al. (2009) Circos: an information aesthetic for comparative genomics. *Genome Res* 19: 1639-1645.
20. Mozhui K, Pandey AK (2017) Conserved effect of aging on DNA methylation and association with EZH2 polycomb protein in mice and humans. *Mech Ageing Dev* 162: 27-37.
21. Aryee MJ, Jaffe AE, Corrada-Bravo H, Ladd-Acosta C, Feinberg AP, et al. (2014) Minfi: a flexible and comprehensive Bioconductor package for the analysis of Infinium DNA methylation microarrays. *Bioinformatics* 30: 1363-1369.
22. De Meyer T, Mampaey E, Vlemmix M, Denil S, Trooskens G, et al. (2013) Quality evaluation of methyl binding domain based kits for enrichment DNA-methylation sequencing. *PLoS One* 8: e59068.
23. Aberg KA, Xie L, Chan RF, Zhao M, Pandey AK, et al. (2015) Evaluation of Methyl-Binding Domain Based Enrichment Approaches Revisited. *PLoS One* 10: e0132205.
24. Aberg KA, McClay JL, Nerella S, Xie LY, Clark SL, et al. (2012) MBD-seq as a cost-effective approach for methylome-wide association studies: demonstration in 1500 case-control samples. *Epigenomics* 4: 605-621.
25. Bock C, Tomazou EM, Brinkman AB, Muller F, Simmer F, et al. (2010) Quantitative comparison of genome-wide DNA methylation mapping technologies. *Nat Biotechnol* 28: 1106-1114.
26. Lienhard M, Grimm C, Morkel M, Herwig R, Chavez L (2014) MEDIPS: genome-wide differential coverage analysis of sequencing data derived from DNA enrichment experiments. *Bioinformatics* 30: 284-286.
27. Chavez L, Jozefczuk J, Grimm C, Dietrich J, Timmermann B, et al. (2010) Computational analysis of genome-wide DNA methylation during the differentiation of human embryonic stem cells along the endodermal lineage. *Genome Res* 20: 1441-1450.
28. Robinson MD, McCarthy DJ, Smyth GK (2010) edgeR: a Bioconductor package for differential expression analysis of digital gene expression data. *Bioinformatics* 26: 139-140.
29. Benjamini Y, Hochberg Y (1995) Controlling the false Discovery Rate: A Practical and Powerful approach to Multiple Testing. *Journal of the Royal Statistical Society Series B (Methodological)* 57: 289-300.
30. Benjamini Y, Drai D, Elmer G, Kafkafi N, Golani I (2001) Controlling the false discovery rate in behavior genetics research. *Behav Brain Res* 125: 279-284.
31. Illingworth RS, Gruenewald-Schneider U, Webb S, Kerr AR, James KD, et al. (2010) Orphan CpG islands identify numerous conserved promoters in the mammalian genome. *PLoS Genet* 6: e1001134.
32. Adjaye J, Herwig R, Herrmann D, Wruck W, Benkahl A, et al. (2004) Cross-species hybridisation of human and bovine orthologous genes on high density cDNA microarrays. *BMC Genomics* 5: 83.
33. Bar-Or C, Czosnek H, Koltai H (2007) Cross-species microarray hybridizations: a developing tool for studying species diversity. *Trends Genet* 23: 200-207.
34. Oshlack A, Chabot AE, Smyth GK, Gilad Y (2007) Using DNA microarrays to study gene expression in closely related species. *Bioinformatics* 23: 1235-1242.

35. Lu Y, Huggins P, Bar-Joseph Z (2009) Cross species analysis of microarray expression data. *Bioinformatics* 25: 1476-1483.
36. Illingworth RS, Bird AP (2009) CpG islands--'a rough guide'. *FEBS Lett* 583: 1713-1720.
37. Heyn H, Moran S, Hernando-Herraez I, Sayols S, Gomez A, et al. (2013) DNA methylation contributes to natural human variation. *Genome Res* 23: 1363-1372.
38. Wagner JR, Busche S, Ge B, Kwan T, Pastinen T, et al. (2014) The relationship between DNA methylation, genetic and expression inter-individual variation in untransformed human fibroblasts. *Genome Biol* 15: R37.
39. Gervin K, Hammero M, Akselsen HE, Moe R, Nygard H, et al. (2011) Extensive variation and low heritability of DNA methylation identified in a twin study. *Genome Res* 21: 1813-1821.
40. Teschendorff AE, Menon U, Gentry-Maharaj A, Ramus SJ, Weisenberger DJ, et al. (2010) Age-dependent DNA methylation of genes that are suppressed in stem cells is a hallmark of cancer. *Genome Res* 20: 440-446.
41. Heyn H, Li N, Ferreira HJ, Moran S, Pisano DG, et al. (2012) Distinct DNA methylomes of newborns and centenarians. *Proc Natl Acad Sci U S A* 109: 10522-10527.
42. Zhang W, Spector TD, Deloukas P, Bell JT, Engelhardt BE (2015) Predicting genome-wide DNA methylation using methylation marks, genomic position, and DNA regulatory elements. *Genome Biol* 16: 14.
43. Lovkvist C, Dodd IB, Sneppen K, Haerter JO (2016) DNA methylation in human epigenomes depends on local topology of CpG sites. *Nucleic Acids Res* 44: 5123-5132.
44. Li Y, Zhu J, Tian G, Li N, Li Q, et al. (2010) The DNA methylome of human peripheral blood mononuclear cells. *PLoS Biol* 8: e1000533.
45. De Meyer T, Bady P, Trooskens G, Kurscheid S, Bloch J, et al. (2015) Genome-wide DNA methylation detection by MethylCap-seq and Infinium HumanMethylation450 BeadChips: an independent large-scale comparison. *Sci Rep* 5: 15375.
46. Tryndyak VP, Han T, Fuscoe JC, Ross SA, Beland FA, et al. (2016) Status of hepatic DNA methylome predetermines and modulates the severity of non-alcoholic fatty liver injury in mice. *BMC Genomics* 17: 298.
47. Orozco LD, Rubbi L, Martin LJ, Fang F, Hormozdiari F, et al. (2014) Intergenerational genomic DNA methylation patterns in mouse hybrid strains. *Genome Biol* 15: R68.
48. Orozco LD, Morselli M, Rubbi L, Guo W, Go J, et al. (2015) Epigenome-wide association of liver methylation patterns and complex metabolic traits in mice. *Cell Metab* 21: 905-917.
49. Walter NA, McWeeney SK, Peters ST, Belknap JK, Hitzemann R, et al. (2007) SNPs matter: impact on detection of differential expression. *Nat Methods* 4: 679-680.
50. Ciobanu DC, Lu L, Mozhui K, Wang X, Jagalur M, et al. (2010) Detection, validation, and downstream analysis of allelic variation in gene expression. *Genetics* 184: 119-128.

51. Bottomly D, Walter NA, Hunter JE, Darakjian P, Kawane S, et al. (2011) Evaluating gene expression in C57BL/6J and DBA/2J mouse striatum using RNA-Seq and microarrays. *PLoS One* 6: e17820.
52. Sloane LB, Stout JT, Vandenberg DJ, Vogler GP, Gerhard GS, et al. (2011) Quantitative trait loci analysis of tail tendon break time in mice of C57BL/6J and DBA/2J lineage. *J Gerontol A Biol Sci Med Sci* 66: 170-178.
53. Peirce JL, Lu L, Gu J, Silver LM, Williams RW (2004) A new set of BXD recombinant inbred lines from advanced intercross populations in mice. *BMC Genet* 5: 7.
54. Mozhui K, Ciobanu DC, Schikorski T, Wang X, Lu L, et al. (2008) Dissection of a QTL hotspot on mouse distal chromosome 1 that modulates neurobehavioral phenotypes and gene expression. *PLoS Genet* 4: e1000260.
55. Lang DH, Gerhard GS, Griffith JW, Vogler GP, Vandenberg DJ, et al. (2010) Quantitative trait loci (QTL) analysis of longevity in C57BL/6J by DBA/2J (BXD) recombinant inbred mice. *Aging Clin Exp Res* 22: 8-19.
56. de Haan G, Van Zant G (1999) Dynamic changes in mouse hematopoietic stem cell numbers during aging. *Blood* 93: 3294-3301.
57. Wang X, Pandey AK, Mulligan MK, Williams EG, Mozhui K, et al. (2016) Joint mouse-human phenome-wide association to test gene function and disease risk. *Nat Commun* 7: 10464.
58. Mulligan MK, Mozhui K, Prins P, Williams RW (2017) GeneNetwork: A Toolbox for Systems Genetics. *Methods Mol Biol* 1488: 75-120.
59. Morgan AP, Fu CP, Kao CY, Welsh CE, Didion JP, et al. (2015) The Mouse Universal Genotyping Array: From Substrains to Subspecies. *G3 (Bethesda)* 6: 263-279.

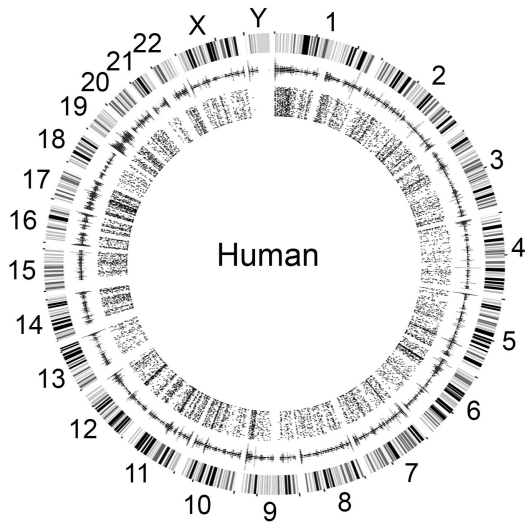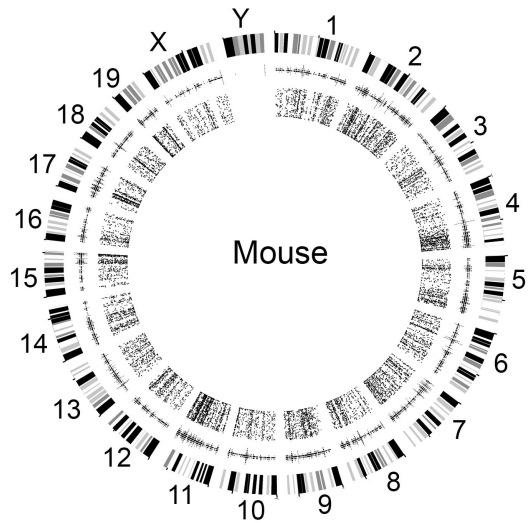

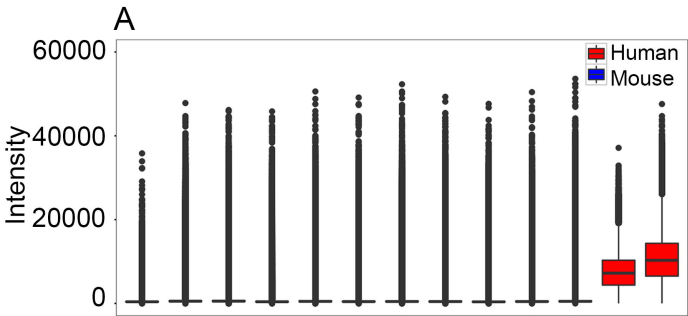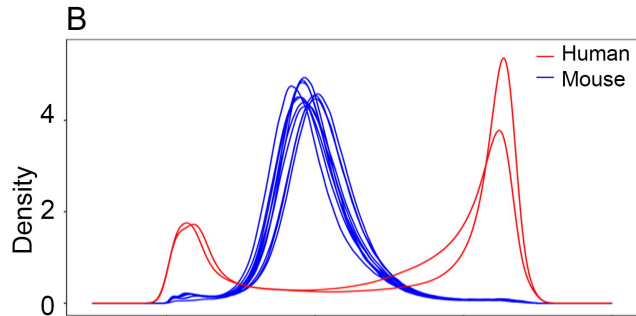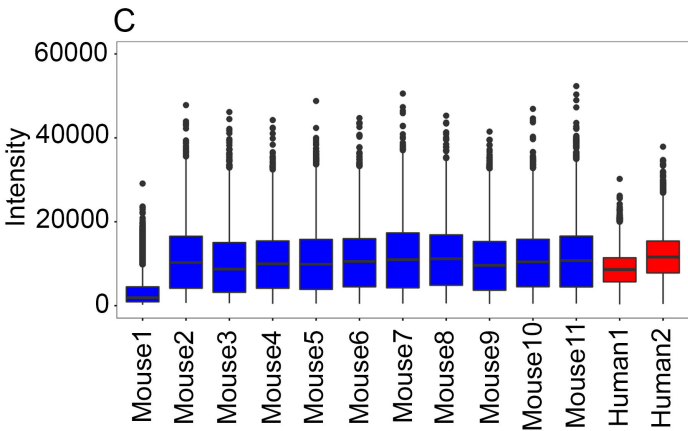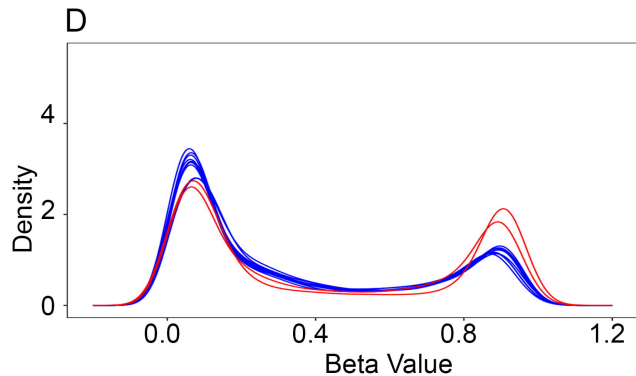



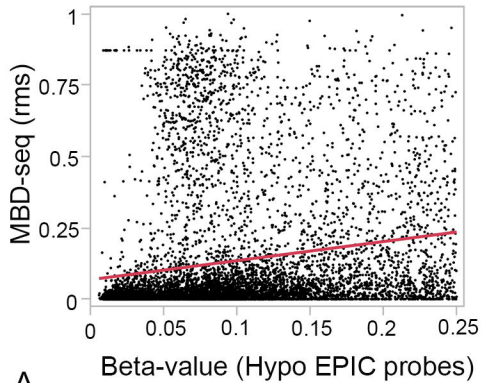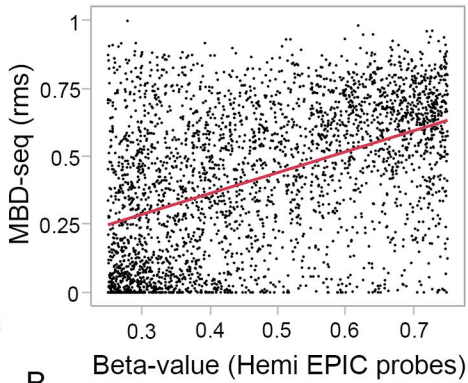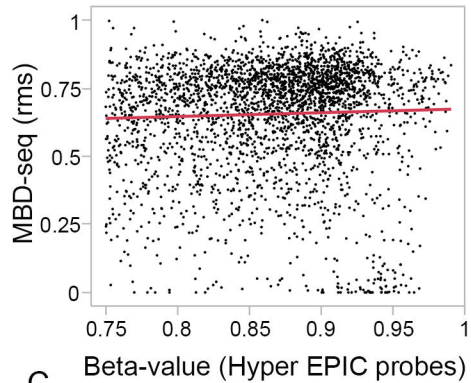

Source: http://biorxiv.org/content/10.1101/194464v1.full.pdf
